# Supplementary material for: A bimetallic Ni–Ti nanoparticle modified indium tin oxide electrode fabricated by the ion implantation method for studying the direct electrocatalytic oxidation of methanol
Source: Royal Society of Chemistry journal article supplement (doi:10.1039/c5gc02551f), 2016-01-01
Supplement: c5gc02551f1.pdf [file c5gc02551f1.pdf]

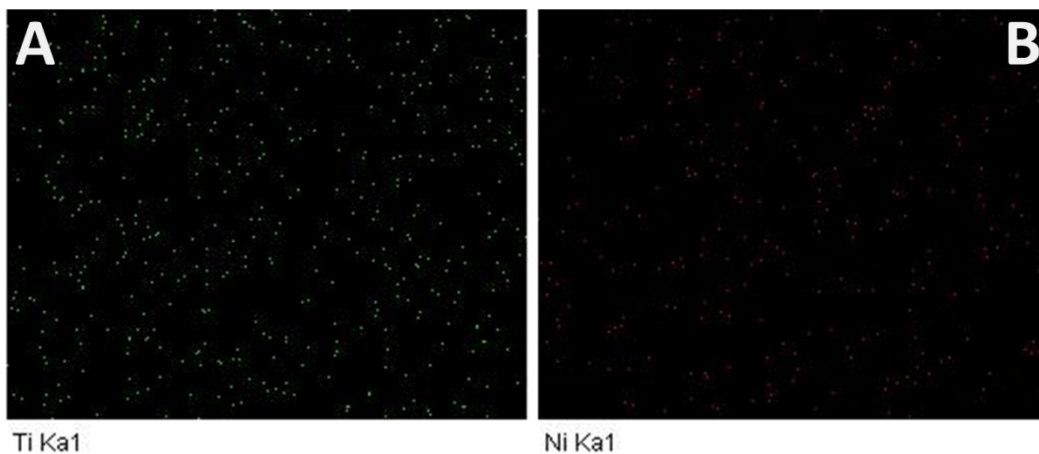

Fig. S1 Elemental mapping for Ti (A) and Ni (B) for Ni-Ti NPs/ITO electrode.

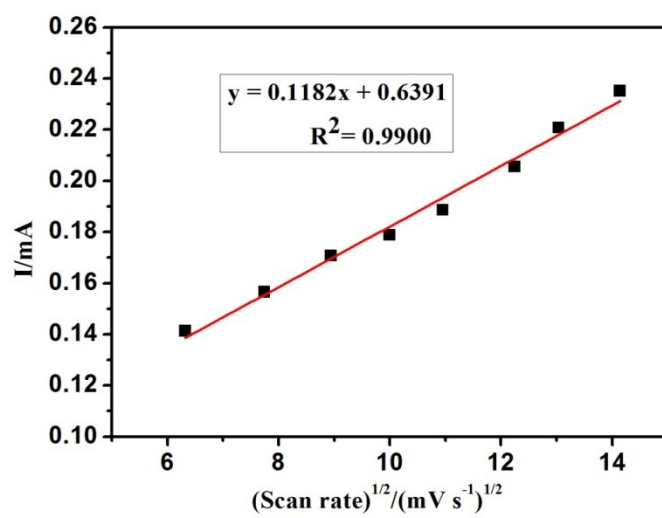

Fig. S2 The peak currents are proportional to square root of scan rates. (The Ni Ti NPs/ITO in 5 mM  $[\text{Fe}(\text{CN})_6]^{3-/4-}$  at various scan rates of 40 to 200mV s<sup>-1</sup>).
